# Supplementary material for: Association between Hydroxyzine Use and Reduced Mortality in Patients Hospitalized for Coronavirus Disease 2019: Results from a multicenter observational study
Source: bioRxiv or medRxiv preprint supplement (doi:10.1101/2020.10.23.20154302), 2020-10-27

**eFigure 1. Course of the levels of the biological inflammatory markers LCRP (A), NLR (B) and IL-6 (C) during the visit according to hydroxyzine daily dose. Vertical lines represent standard errors.**

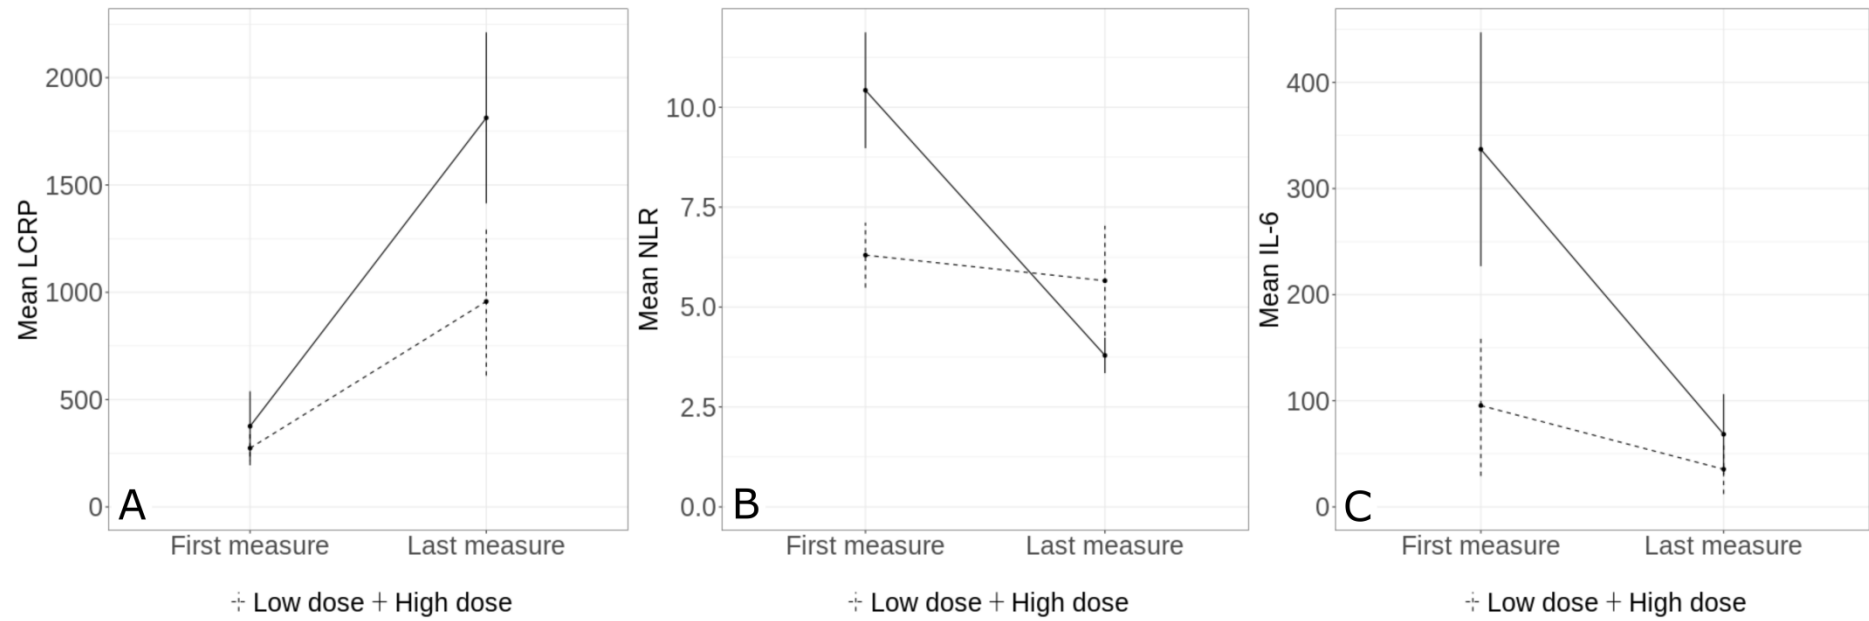

Supplement: Supplementary file [file media-1.pdf]
