# Supplementary material for: Association between Hydroxyzine Use and Reduced Mortality in Patients Hospitalized for Coronavirus Disease 2019: Results from a multicenter observational study
Source: bioRxiv or medRxiv preprint supplement (doi:10.1101/2020.10.23.20154302), 2020-10-27

**eFigure 2. Quantitative bias analysis based on the observed residual differences in age (A) and other patients characteristics (B).**

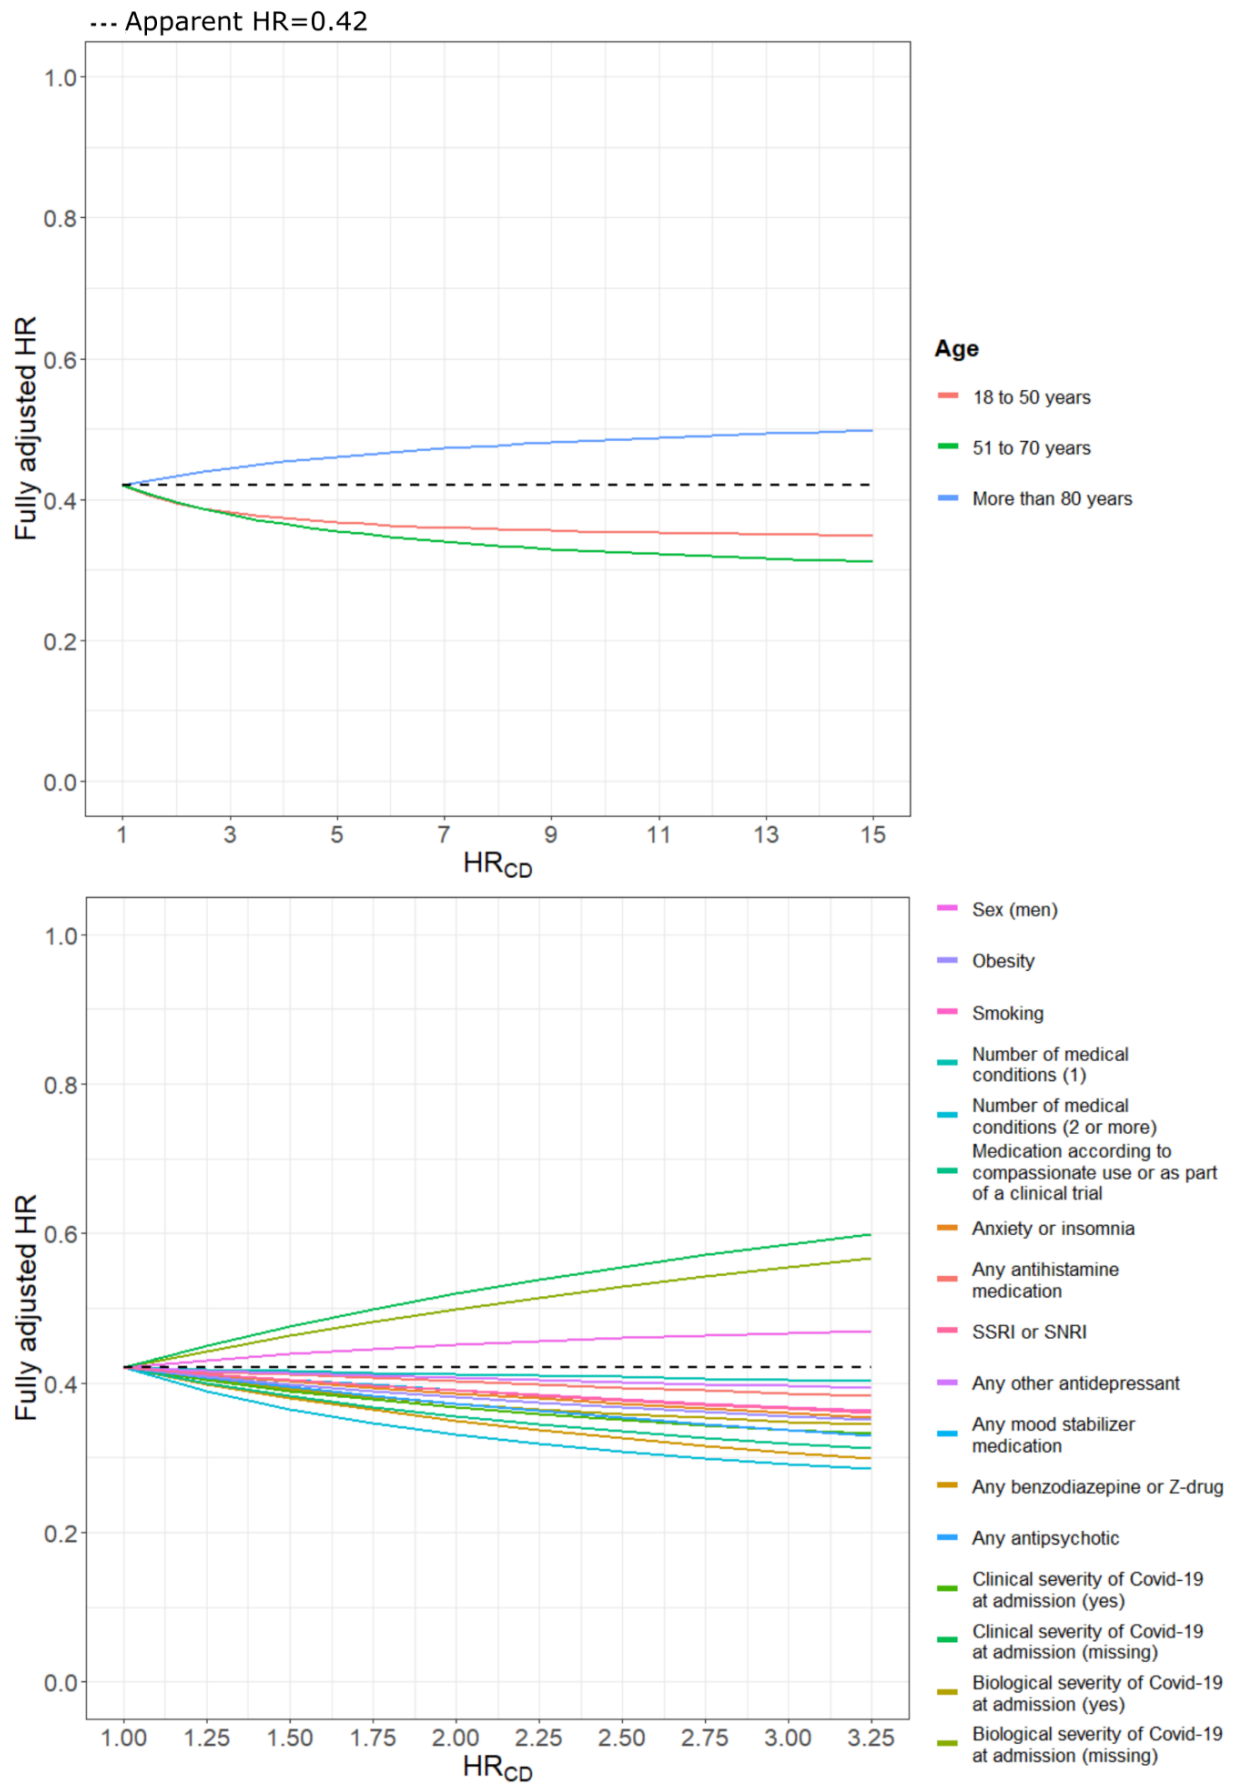

Supplement: Supplementary file [file media-2.pdf]
