# Supplementary material for: Association between Hydroxyzine Use and Reduced Mortality in Patients Hospitalized for Coronavirus Disease 2019: Results from a multicenter observational study
Source: bioRxiv or medRxiv preprint supplement (doi:10.1101/2020.10.23.20154302), 2020-10-27
Supplement: Supplementary file [file media-5.pdf]

**eTable 3. Comparing the associations of hydroxyzine use and zopiclone use with the endpoint of death in the full sample and in the matched analytic sample.**

|                                | Number of events /<br>Number of patients | Crude Cox<br>regression analysis | Multivariable Cox<br>regression analysis | Analysis weighted<br>by inverse-<br>probability-<br>weighting weights | Number of events<br>/ Number of<br>patients | Univariate Cox<br>regression in the<br>matched analytic<br>sample (1:1) |
|--------------------------------|------------------------------------------|----------------------------------|------------------------------------------|-----------------------------------------------------------------------|---------------------------------------------|-------------------------------------------------------------------------|
|                                | N (%)                                    | HR (95% CI; p-<br>value)         | HR (95% CI; p-<br>value) (df=24)         | HR (95% CI; p-<br>value)                                              | N (%)                                       | HR (95% CI; p-<br>value)                                                |
| Zopiclone                      | 46 / 151 (30.5%)                         | Ref.                             | Ref.                                     | Ref.                                                                  | 4 / 12 (33.3%)                              | Ref.                                                                    |
| Hydroxyzine                    | 14 / 129 (10.9%)                         | 0.38 (0.21 - 0.70;<br>0.002*)    | 0.39 (0.21 – 0.73;<br>0.003*)            | 0.32 (0.15 – 0.70;<br>0.004*)                                         | 14 / 129 (10.9%)                            | 0.27 (0.09 – 0.83;<br>0.022*)                                           |
| Hydroxyzine and<br>Zopiclone   | 1 / 9 (1.1%)                             | 0.27 (0.04 - 2.00;<br>0.201)     | 0.29 (0.04 – 2.43;<br>0.255)             | 0.06 (0.01 – 0.49;<br>0.009*)                                         | 1 / 9 (1.1%)                                | 0.19 (0.02 – 1.68;<br>0.135)                                            |
| No hydroxyzine<br>or Zopiclone | 933 / 7056 (13.2%)                       | 0.61 (0.45 - 0.82;<br>0.001*)    | 0.85 (0.62 – 1.16;<br>0.305)             | 0.74 (0.51 – 1.08;<br>0.116)                                          | 49 / 264 (18.6%)                            | 0.61 (0.22 – 1.70;<br>0.349)                                            |

\* p-value is significant (p<0.05).
