# Supplementary material for: Association between Hydroxyzine Use and Reduced Mortality in Patients Hospitalized for Coronavirus Disease 2019: Results from a multicenter observational study
Source: bioRxiv or medRxiv preprint supplement (doi:10.1101/2020.10.23.20154302), 2020-10-27
Supplement: Supplementary file [file media-6.pdf]

**eTable 4. Associations between hydroxyzine daily dose and the endpoint of death among patients using hydroxyzine during the visit (N=138).**

|                   | <b>Number of events /<br/>Number of patients</b> | <b>Crude Cox regression<br/>analysis</b> | <b>Cox regression adjusted<br/>for age and sex</b> | <b>Multivariable Cox<br/>regression analysis</b> |
|-------------------|--------------------------------------------------|------------------------------------------|----------------------------------------------------|--------------------------------------------------|
|                   | N (%)                                            | HR (95% CI; p-value)                     | HR (95% CI; p-value)<br>(df=6)                     | HR (95% CI; p-value)<br>(df=22)                  |
| <i>Daily dose</i> |                                                  |                                          |                                                    |                                                  |
| Lower doses       | 8 / 53 (15.1%)                                   | Ref.                                     | Ref.                                               | Ref.                                             |
| Higher doses      | 2 / 53 (3.8%)                                    | 0.11 (0.02 – 0.48; 0.004*)               | 0.12 (0.03 – 0.57; 0.007*)                         | 0.10 (0.02 – 0.45; 0.003*)                       |

\* p-value is significant (p<0.05).

Because daily dose could not be ascertained with certainty in 32 (23.2%) patients, these patients have been excluded from this analysis. The variable ‘daily dose’ has been dichotomized by the median.
