# Supplementary material for: Association between Hydroxyzine Use and Reduced Mortality in Patients Hospitalized for Coronavirus Disease 2019: Results from a multicenter observational study
Source: bioRxiv or medRxiv preprint supplement (doi:10.1101/2020.10.23.20154302), 2020-10-27
Supplement: Supplementary file [file media-7.pdf]

**eTable 5. Association between levels of the biological inflammatory markers NLR, LCRP, IL-6 and lactates and the endpoint of death in the subsamples of patients with COVID-19 who had at least two measures of each marker during the visit.**

|                                            | First measure                            |                                               | Last measure                             |                                               |
|--------------------------------------------|------------------------------------------|-----------------------------------------------|------------------------------------------|-----------------------------------------------|
|                                            | Number of events /<br>Number of patients | Crude Cox regression<br>analysis <sup>α</sup> | Number of events /<br>Number of patients | Crude Cox regression<br>analysis <sup>α</sup> |
|                                            | Events / N (%)                           | HR (95% CI; p-value)                          | Events / N (%)                           | HR (95% CI; p-value)                          |
| <b>Biological inflammatory<br/>markers</b> |                                          |                                               |                                          |                                               |
| LCRP                                       | 426 / 1,879 (22.7%)                      | 0.83 (0.76 - 0.90; <0.001*)                   | 423 / 1,876 (22.5%)                      | 0.47 (0.43 - 0.60; <0.001*)                   |
| NLR                                        | 492 / 2,158 (22.8%)                      | 1.26 (1.11 - 1.43; <0.001*)                   | 493 / 2,159 (22.8%)                      | 2.71 (2.47 - 2.96; <0.001*)                   |
| IL-6                                       | 53 / 315 (16.8%)                         | 1.29 (1.06 - 1.57; 0.010*)                    | 53 / 3,15 (16.8%)                        | 1.53 (1.33 - 1.76; <0.001*)                   |
| Lactates                                   | 319 / 1,159 (27.5%)                      | 1.27 (0.79 – 2.03; 0.326)                     | 823 / 1,163 (27.8%)                      | 2.75 (2.43 – 3.13; <0.001*)                   |

<sup>α</sup> Values were log-transformed to address non-normal distribution of the biological variables.
