# Supplementary material for: Association between Hydroxyzine Use and Reduced Mortality in Patients Hospitalized for Coronavirus Disease 2019: Results from a multicenter observational study
Source: bioRxiv or medRxiv preprint supplement (doi:10.1101/2020.10.23.20154302), 2020-10-27
Supplement: Supplementary file [file media-8.pdf]

**eTable 6. Course of the levels of the biological inflammatory markers NLR, LCRP, IL-6 and lactates during the visit according to hydroxyzine use.**

|                                        | <b>Full population</b>    | <b>Exposed to hydroxyzine</b> | <b>Not exposed to hydroxyzine</b> | <b>Two-way ANOVA:<br/>Interaction term</b> |
|----------------------------------------|---------------------------|-------------------------------|-----------------------------------|--------------------------------------------|
|                                        | N / Mean (SD)             | N / Mean (SD)                 | N / Mean (SD)                     | F (p) <sup>α</sup>                         |
| <b>Biological inflammatory markers</b> |                           |                               |                                   |                                            |
| LCRP                                   |                           |                               |                                   | 16.33 (<0.001*)                            |
| <i>First measurement</i>               | 1,879 / 695.1 (2,732.0)   | 63 / 308.4 (666.3)            | 1,816 / 708.5 (2,775.3)           |                                            |
| <i>Last measurement</i>                | 1,879 / 1,396.2 (3,831.7) | 63 / 1,640.5 (2,673.9)        | 1,816 / 1,387.7 (3,865.9)         |                                            |
| NLR                                    |                           |                               |                                   | 14.80 (<0.001*)                            |
| <i>First measurement</i>               | 2,161 / 7.1 (6.8)         | 72 / 8.3 (6.8)                | 2,089 / 7.1 (6.8)                 |                                            |
| <i>Last measurement</i>                | 2,161 / 6.8 (9.1)         | 72 / 4.9 (5.8)                | 2,089 / 6.8 (9.2)                 |                                            |
| IL-6                                   |                           |                               |                                   | 5.87 (0.016*)                              |
| <i>First measurement</i>               | 315 / 182.4 (405.7)       | 10/ 216.2 (230.1)             | 305 / 181.2 (410.4)               |                                            |
| <i>Last measurement</i>                | 315 / 238.1 (800.2)       | 10 / 51.9 (68.6)              | 305 / 244.2 (812.4)               |                                            |
| Lactates                               |                           |                               |                                   | 0.94 (0.333)                               |
| <i>First measurement</i>               | 1,142 / 1.5 (0.8)         | 43 / 1.4 (0.7)                | 1,099 / 1.5 (0.8)                 |                                            |
| <i>Last measurement</i>                | 1,142 / 1.5 (1.3)         | 43 / 1.2 (0.5)                | 1,099 / 1.6 (1.3)                 |                                            |

<sup>α</sup> Values were log-transformed to address non-normal distribution of the biological variables.

\* p-value is significant (p<0.05).
