# Supplementary material for: Association between Hydroxyzine Use and Reduced Mortality in Patients Hospitalized for Coronavirus Disease 2019: Results from a multicenter observational study
Source: bioRxiv or medRxiv preprint supplement (doi:10.1101/2020.10.23.20154302), 2020-10-27
Supplement: Supplementary file [file media-9.pdf]

**eTable 7. Course of the levels of the biological inflammatory markers NLR, LCRP, and IL-6 during the visit according to hydroxyzine dose.**

|                                        | <b>Full population</b> | <b>Low dosage</b>    | <b>High dosage</b>     | <b>Two-way ANOVA:<br/>Interaction term</b> |
|----------------------------------------|------------------------|----------------------|------------------------|--------------------------------------------|
|                                        | N / Mean (SD)          | N / Mean (SD)        | N / Mean (SD)          | F (p) <sup>α</sup>                         |
| <b>Biological inflammatory markers</b> |                        |                      |                        |                                            |
| LCRP                                   |                        |                      |                        | 4.57 (0.037*)                              |
| <i>First measurement</i>               | 55 / 329.2 (708.6)     | 25 / 273.5 (399.4)   | 30 / 375.6 (893.4)     |                                            |
| <i>Last measurement</i>                | 55 / 1,423.8 (2,016.8) | 25 / 957.2 (1,728.3) | 30 / 1,812.7 (2,181.2) |                                            |
| NLR                                    |                        |                      |                        | 5.62 (0.021*)                              |
| <i>First measurement</i>               | 60 / 8.6 (7.2)         | 26 / 6.3 (4.1)       | 34 / 10.4 (8.4)        |                                            |
| <i>Last measurement</i>                | 60 / 4.6 (5.0)         | 26 / 5.7 (7.0)       | 34 / 3.8 (2.6)         |                                            |
| IL-6                                   |                        |                      |                        | 0.62 (0.454)                               |
| <i>First measurement</i>               | 10 / 216.2 (230.1)     | 5 / 95.5 (148.4)     | 337.0 (246.3)          |                                            |
| <i>Last measurement</i>                | 10 / 51.9 (68.6)       | 5 / 35.5 (52.3)      | 68.4 (84.7)            |                                            |

<sup>α</sup> Values were log-transformed to address non-normal distribution of the biological variables.

\* p-value is significant (p<0.05).
